# Supplementary material for: Dimer Interface in Natural Variant NK1 Is Dispensable for HGF-Dependent Met Receptor Activation
Source: MDPI journal article supplement (doi:10.3390/ijms22179240), 2021-08-26
Supplement: s1 [file s1]

## Supplementary Materials

**Table S1.** Primer sets used for the construction of plasmid DNA.

| Primer Set           | Sequences                                                                 |
|----------------------|---------------------------------------------------------------------------|
| Asn127Ala            | 5'-ACTACATTAGAGCATGCATCATTGGT-3'<br>5'-ACCAATGATGCATGCTCTAATGTAGT-3'      |
| Val140Ala            | 5'-TACAAGGGAACAGCATCTATCACTAAGA-3'<br>5'-TCTTAGTG ATAGATGCTGTTCCCTTGTA-3' |
| Lys144Ala            | 5'-TCTATCACTGCAAGTGGCATCA-3'<br>5'-TGATGCCACTTGCACTGATAGA-3'              |
| NK1 fragment for HGF | 5'-ATGTGGGTGACCAAACCTCCT-3'<br>5'-TTCAACTTCTGAACACTGAGGAAT-3'             |
| in-fusion cloning-1  | 5'-GACAATAACCCCTGATAAATGCTTC-3'<br>5'-CATTTATCAGGGTTATTGTCTCATG-3'        |
| in-fusion cloning-2  | 5'-TTTGGTCACCCACATGGT-3'<br>5'-TG TTCAGAAAGTTGAATGCATGA-3'                |

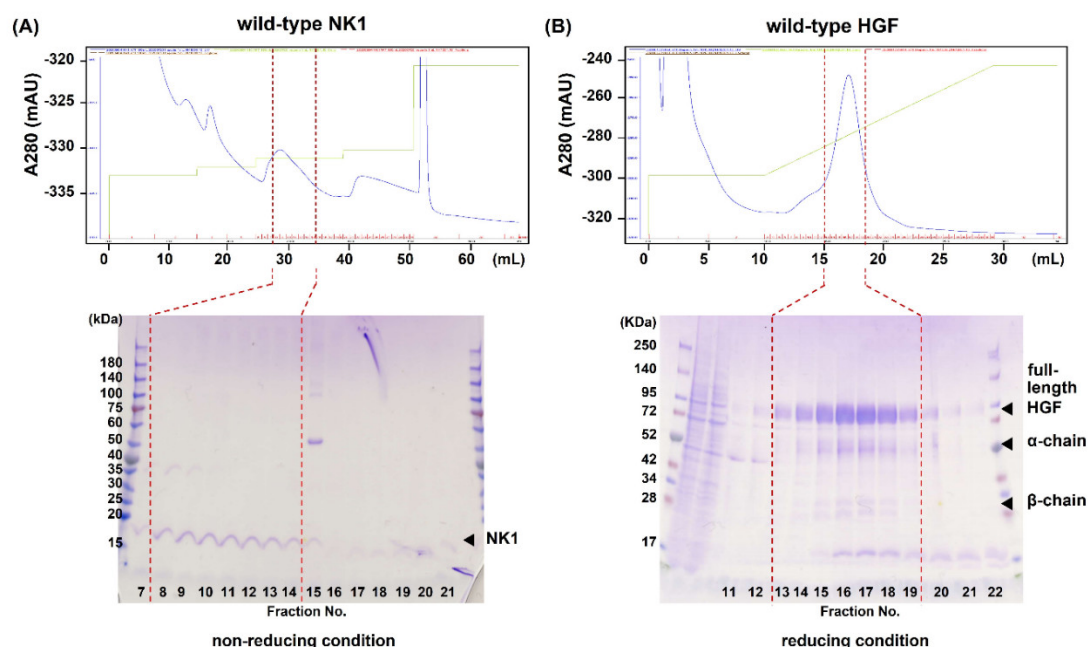

**Figure S1.** Elution profiles and purification of wild-type NK1 (A) and wild-type HGF (B) in heparin-affinity chromatography. CBB staining of proteins after SDS-PAGE is shown in the bottom panels. Elution profiles of mutant NK1 and HGF were similar to those of wild-type NK1 and HGF.

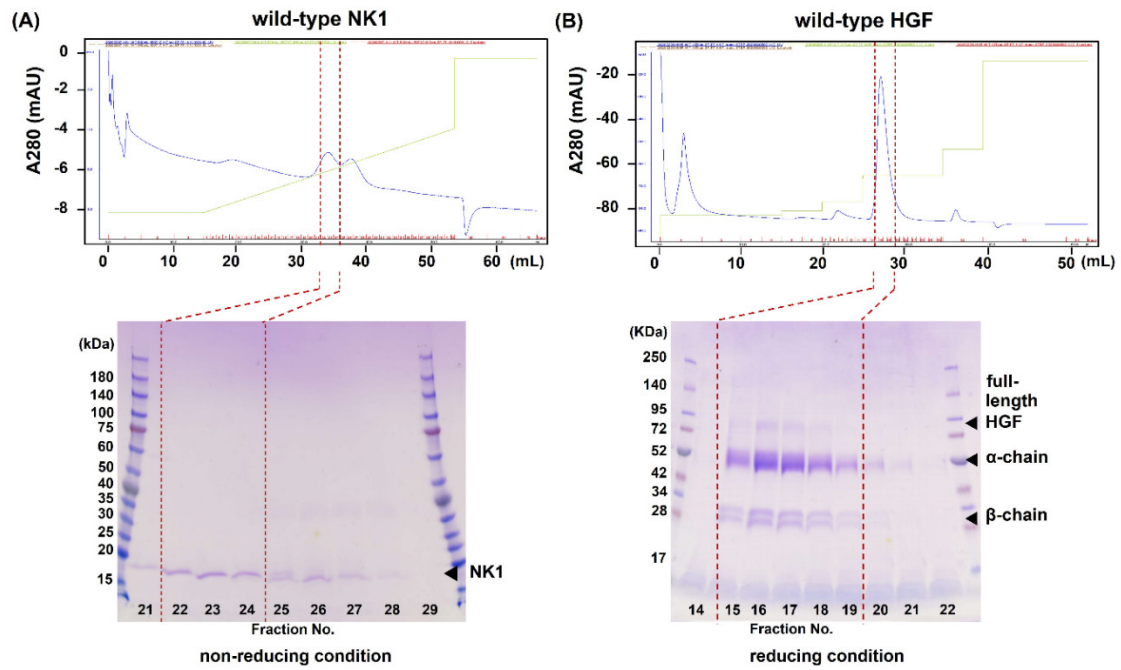

**Figure S2.** Elution profiles and purification of wild-type NK1 (A) and wild-type HGF (B) in cation exchange chromatography. CBB staining of proteins after SDS-PAGE is shown in the bottom panels. Elution profiles of mutant NK1 and HGF were similar to those of wild-type NK1 and HGF.

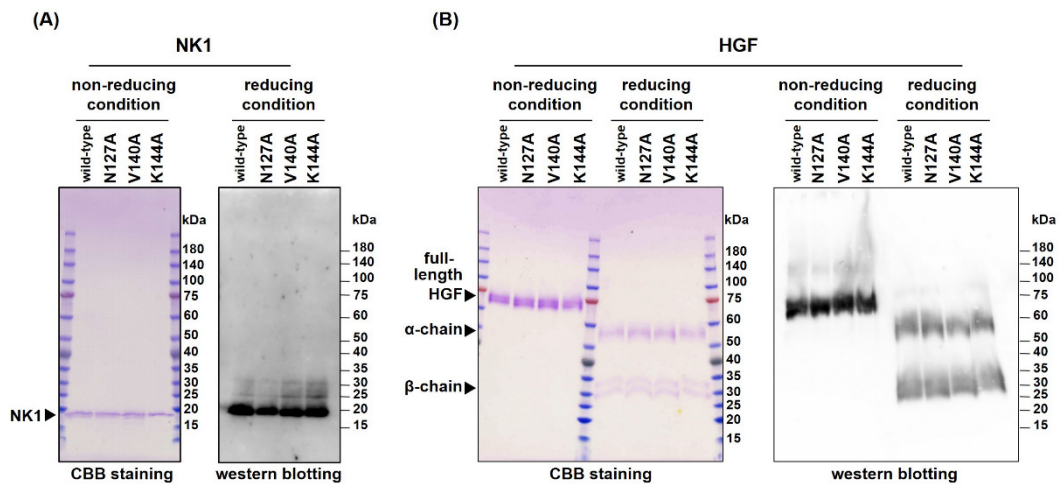

**Figure S3.** Recombinant NK1 (A) and HGF (B) confirmed by protein staining and Western blotting. Recombinant proteins were electrophoresed on a 5–20% gradient gel under non-reducing and reducing (by 2-mercaptoethanol) conditions. Proteins were stained with Coomassie Brilliant Blue (CBB) (left) and detected by Western blot analysis (right). Wild-type and mutant HGF show a single band and two bands in non-reducing and reducing conditions, respectively.

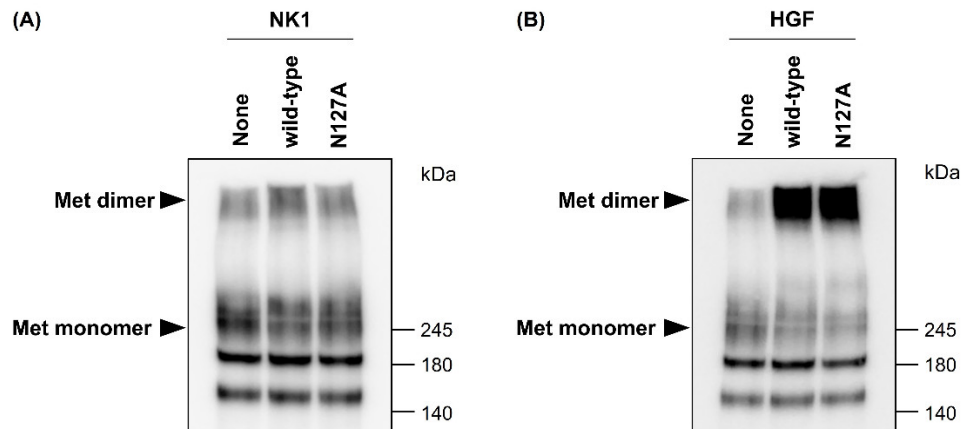

**Figure S4.** Met dimer formation promoted by NK1 and HGF. EHMES-1 cells were left untreated or treated with 30 nM wild-type and mutant NK1 or 1 nM wild-type and mutant HGF. Met dimer formation was analyzed by chemical cross-linking, immunoprecipitation, SDS-PAGE, and Western blotting.
